# Supplementary material for: Local Piezoelectric Response of Polymer/Ceramic Nanocomposite Fibers
Source: MDPI journal article supplement (doi:10.3390/polym14245379), 2022-12-08
Supplement: s1 [file s1]

# Local Piezoelectric Response of Polymer/Ceramic Nanocomposite Fibers

Aurora Magnani <sup>1</sup>, Simone Capaccioli <sup>1,2,3</sup>, Bahareh Azimi <sup>4,5</sup>, Serena Danti <sup>4</sup> and Massimiliano Labardi <sup>2,\*</sup>

<sup>1</sup> Dipartimento di Fisica "Enrico Fermi", Università di Pisa, Largo Pontecorvo 3, 56127 Pisa, Italy

<sup>2</sup> CNR-IPCF, Pisa Unit, Largo Pontecorvo 3, 56127 Pisa, Italy

<sup>3</sup> CISUP, Centro per l'Integrazione della Strumentazione dell'Università di Pisa, 56126 Pisa, Italy

<sup>4</sup> Dipartimento di Ingegneria Civile ed Industriale (DICI), Università di Pisa, L. Lazzarino 1, 56122 Pisa, Italy

<sup>5</sup> Department of Translational Research and New Technologies in Medicine and Surgery, University of Pisa, 56126 Pisa, Italy

\* Correspondence: labardi@df.unipi.it; Tel.: +39-050-2214322

## Supplementary material

**Figure S1. Thermogravimetric analysis (in air flux) of the composite nanofiber sample.**

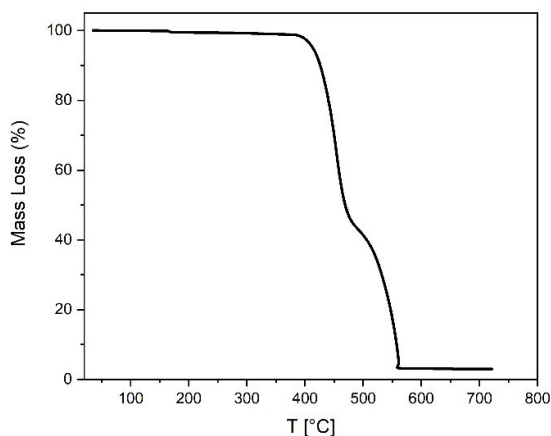

**Figure S2. Differential scanning calorimetry analysis of the composite nanofiber sample.**

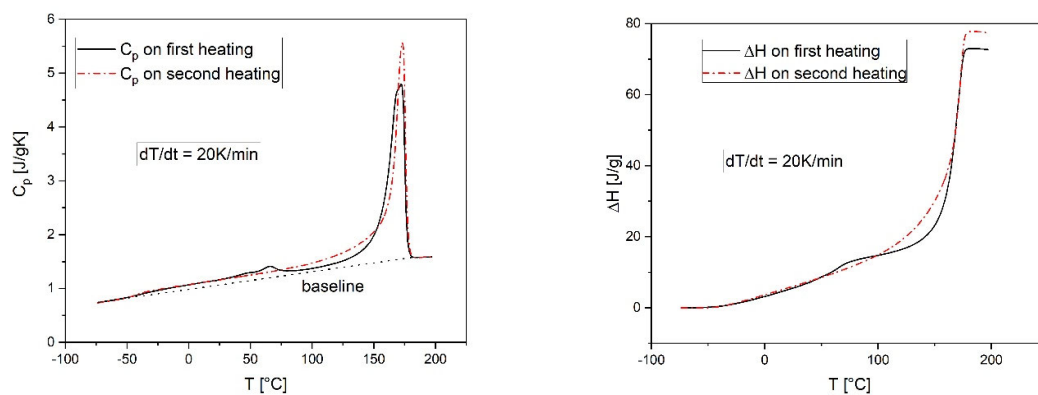

**Figure S3. PFM amplitude scan of an electrospun PVDF/BaTiO<sub>3</sub> composite nanofiber transferred on a doped silicon substrate (Figure 2), with indications of three different regions: substrate (1), domain (2), nanofiber (3).**

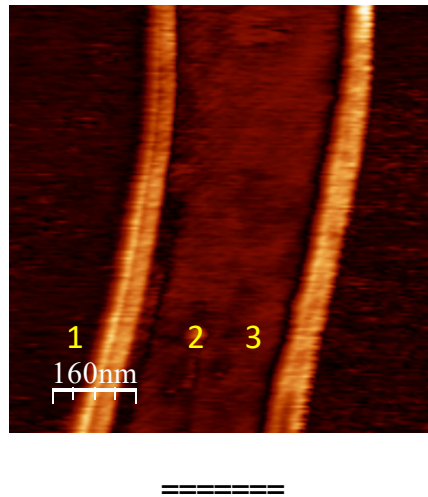

**Table S3. Average piezoresponse on three different regions indicated in Figure S3.**

| Position          | Piezoelectric coefficient |
|-------------------|---------------------------|
| Zone 1: substrate | 6 pm/V                    |
| Zone 2: domain    | 31 pm/V                   |
| Zone 3: nanofiber | 13 pm/V                   |

**Figure S4. Topography, resonance frequency shift (Dw) and piezoresponse (DA) scan of an electrospun PVDF/BaTiO<sub>3</sub> composite nanofiber as deposited on the rotating electrospinning aluminum substrate, on which a BaTiO<sub>3</sub> nanoparticle is also visible. Figure 4 was extracted from these topography and PFM amplitude full scans.**

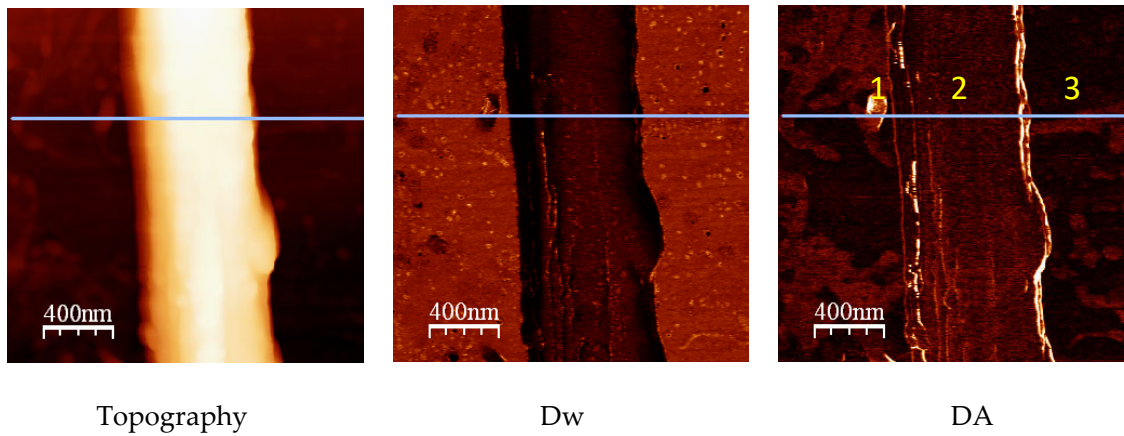

**Table S4. average piezoelectric coefficients on nanoparticle, nanofiber, and substrate in Figure S4.**

| Position             | Piezoelectric coefficient |
|----------------------|---------------------------|
| Zone 1: nanoparticle | $60 \pm 20$ pm/V          |
| Zone 2: nanofiber    | $17 \pm 6$ pm/V           |
| Zone 3: substrate    | $7 \pm 3$ pm/V            |
